# Supplementary material
Source: MDPI journal article supplement (https://www.mdpi.com/2073-4441/13/20/2898)
Supplement: s1 [file s1]

No.

Date \_\_\_\_\_

Name \_\_\_\_\_

**[1] Your family** (This question for who knows your family members' dairy lives.)

1. Please describe age, sex of people living with you. And check the cell if they go to school/work.

2. How often do you have meal at home per day?

|   | Go to<br>school/work                | Age | Female<br>or Male | 2. How often do you have meal at home per day? |       |        |           |       |        |
|---|-------------------------------------|-----|-------------------|------------------------------------------------|-------|--------|-----------|-------|--------|
|   |                                     |     |                   | Weekday                                        |       |        | Weekend   |       |        |
|   |                                     |     |                   | Breakfast                                      | Lunch | Dinner | Breakfast | Lunch | Dinner |
| a | <input type="checkbox"/>            |     | F / M             |                                                |       |        |           |       |        |
| b | <input type="checkbox"/>            |     | F / M             |                                                |       |        |           |       |        |
| c | <input type="checkbox"/>            |     | F / M             |                                                |       |        |           |       |        |
| d | <input type="checkbox"/>            |     | F / M             |                                                |       |        |           |       |        |
| e | <input checked="" type="checkbox"/> |     | F / M             |                                                |       |        |           |       |        |
| f | <input type="checkbox"/>            |     | F / M             |                                                |       |        |           |       |        |
| g | <input type="checkbox"/>            |     | F / M             |                                                |       |        |           |       |        |
| h | <input type="checkbox"/>            |     | F / M             |                                                |       |        |           |       |        |
| i | <input type="checkbox"/>            |     | F / M             |                                                |       |        |           |       |        |
| j | <input type="checkbox"/>            |     | F / M             |                                                |       |        |           |       |        |

**[2] Kitchen**

1. How many times do you usually cook at home?

| Weekday | Weekend |
|---------|---------|
|         |         |

2. How do you throw kitchen garbage?

- ☐ Put it in the garbage bin      ☐ Throw it down the drain

3. How do you throw food scraps on the dishes?

- ☐ Wipe them      ☐ Wash them down the drain

**[3] Wastewater** (This question for who manage water supply/ wastewater treatment.)

Pit

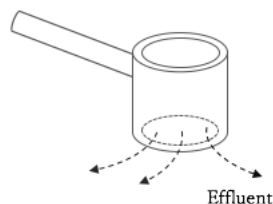

Septic tank

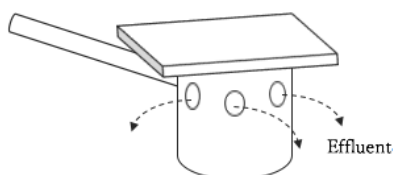

Septic tank with treatment

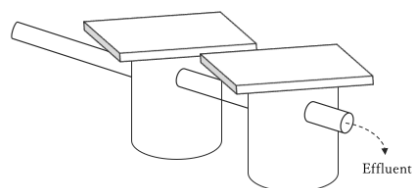

Buffalo tank

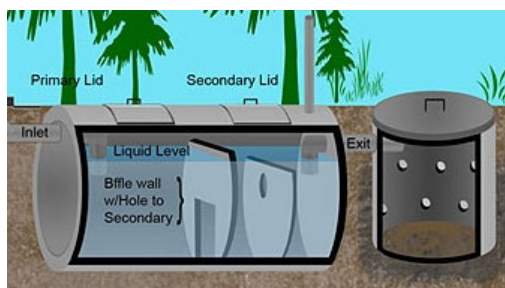

dispose directly

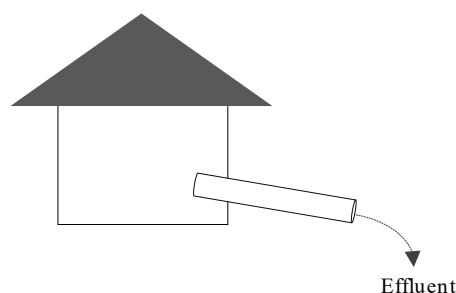

1. How to discharge wastewater of your house now? Please fill “A” in the cell below table.

2. Do you have a realistic plan for wastewater sanitation in the near future?

If you have, please fill “F” in.

\* If you have more than one sanitation system, please describe separately with other letters (B, C...).

|                                              | Wastewater from... |         |      |         |
|----------------------------------------------|--------------------|---------|------|---------|
|                                              | Toilet             | Kitchen | Bath | Laundry |
| Dispose into drains, street or soil directly |                    |         |      |         |
| Pit                                          |                    |         |      |         |
| Septic tank                                  |                    |         |      |         |
| Septic tank with treatment                   |                    |         |      |         |
| Buffalo tank                                 |                    |         |      |         |
| Others ( )                                   |                    |         |      |         |

3. the depth of your onsite sanitation system

\_\_\_\_\_ m

#### 4. How often do you remove the sludge?

- ☐ within a few years      ☐ more than five years ago      ☐ never

#### 5. When was the last/the second from the last removal?

|                                  |  |
|----------------------------------|--|
| The last removal                 |  |
| The second from the last removal |  |

#### 6. How do you think about the frequency? (Residents will write the line)

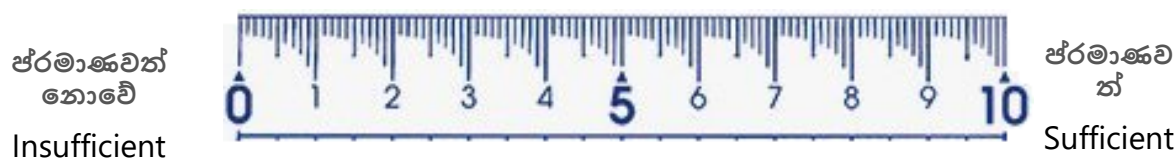

#### [4] Personal care products

Please specify the category of household products you use at home

| Clothes washing                                                                                                                                                                                                                                      | Bathroom                                                                                                                                                                                                                                                                | Kitchen and others                                                                                                                                                                                                                               |
|------------------------------------------------------------------------------------------------------------------------------------------------------------------------------------------------------------------------------------------------------|-------------------------------------------------------------------------------------------------------------------------------------------------------------------------------------------------------------------------------------------------------------------------|--------------------------------------------------------------------------------------------------------------------------------------------------------------------------------------------------------------------------------------------------|
| <input type="checkbox"/> Powder detergent<br><input type="checkbox"/> Liquid detergent<br><input type="checkbox"/> Bleach, whitening agent<br><input type="checkbox"/> Soap<br><input type="checkbox"/> Softener<br><input type="checkbox"/> Others: | <input type="checkbox"/> Shampoo<br><input type="checkbox"/> Conditioner<br><input type="checkbox"/> Soap<br><input type="checkbox"/> Body wash<br><input type="checkbox"/> Fragrance, perfume<br><input type="checkbox"/> Cosmetic<br><input type="checkbox"/> Others: | <input type="checkbox"/> Dish washer<br><input type="checkbox"/> Multi-purpose floor cleaner<br><input type="checkbox"/> Disinfectant<br><input type="checkbox"/> Degreaser<br><input type="checkbox"/> Soap<br><input type="checkbox"/> Others: |

#### [5] Medicines

##### 1. Did you purchase/receive medicines in the last 3 months?

|                           | No                       | Yes (1-3 times)          | Yes (> 3 times)          |
|---------------------------|--------------------------|--------------------------|--------------------------|
| Non-prescription medicine | <input type="checkbox"/> | <input type="checkbox"/> | <input type="checkbox"/> |
| Prescription medicine     | <input type="checkbox"/> | <input type="checkbox"/> | <input type="checkbox"/> |

**2. Please specify the category medicine you keep at home (more than 1 answer is possible)**

| Non-prescription medicine                                                                                                                                                                                                                                                                                                                                                                                                                                                                                              | Prescription medicine                                                                                                                                                                                                                                                                                                                                                                                                                                                                                                                                                                                                                                                                                       |
|------------------------------------------------------------------------------------------------------------------------------------------------------------------------------------------------------------------------------------------------------------------------------------------------------------------------------------------------------------------------------------------------------------------------------------------------------------------------------------------------------------------------|-------------------------------------------------------------------------------------------------------------------------------------------------------------------------------------------------------------------------------------------------------------------------------------------------------------------------------------------------------------------------------------------------------------------------------------------------------------------------------------------------------------------------------------------------------------------------------------------------------------------------------------------------------------------------------------------------------------|
| <input type="checkbox"/> Cold or influenza drugs<br><input type="checkbox"/> Pain-killers, analgesics<br><input type="checkbox"/> Digestive aids<br><input type="checkbox"/> Allergy drugs<br><input type="checkbox"/> Anti-inflammatory<br><input type="checkbox"/> Anti-biotic<br><input type="checkbox"/> Dietary supplementary (vitamin, iron supplement, joint-pain, liver function ...)<br><input type="checkbox"/> Cream, paste, ointment, liquid medicine for external use<br><input type="checkbox"/> Others: | <input type="checkbox"/> Ulcer, cancer<br><input type="checkbox"/> Hypertensive, cardiovascular<br><input type="checkbox"/> Liver, gall, pancreas (not including liver supplement)<br><input type="checkbox"/> Parkinson<br><input type="checkbox"/> Virus<br><input type="checkbox"/> Fungus, bacterial contamination<br><input type="checkbox"/> Tuberculosis<br><input type="checkbox"/> Malaria<br><input type="checkbox"/> Gout<br><input type="checkbox"/> Endocrine disorder<br><input type="checkbox"/> Immune system relating<br><input type="checkbox"/> Insomniac<br><input type="checkbox"/> Kidney<br><input type="checkbox"/> Psychology, mental disorder<br><input type="checkbox"/> Others: |

**3. Have you ever received guideline on how to dispose the unused/expired medicines?**

- ☐ No
- ☐ Yes (please specify: .....)

**4. What do you do with the unused/expired medicines?**

|                         | Keep at home             | Dispose at home          | Give it to others        | Return to pharmacy       | Others                   |
|-------------------------|--------------------------|--------------------------|--------------------------|--------------------------|--------------------------|
| <b>Expired medicine</b> | <input type="checkbox"/> |
| <b>Unsuad medicine</b>  | <input type="checkbox"/> |

**5. How do you dispose unused/expired medicine?**

(If you have not disposed yet, please indicate the way you might do.)

- ☐ Household trash
 ☐ Flush down sink
 ☐ Flush down toilet  
☐ Burnt with solid waste
 ☐ Others (please specify: ..... )
