# Supplementary material
Source: MDPI journal article supplement (https://www.mdpi.com/2073-4441/13/20/2898)
Supplement: s1 [file s1]

Archive with 2 entries (2 files):
- SI-Pre-survey questionnaire.pdf
- SI-Table.xlsx
