# Supplementary material
Source: MDPI journal article supplement (https://www.mdpi.com/2073-4441/13/20/2898)
Supplement: s1 [file s1 › SI-Table.xlsx]

## Sheet: Table S1
Table S1. Screening test result of Hikkaduwa wastewater sample
(D: Detected; ND: Not Detected)
Hikkaduwa Sewage Treatment Plant (6° 8' 54.85"N, 80° 6' 34.53"E) receives domestic wastewater of approximately 3000 inhabitants. The STP solely utilizes two facultative ponds (6500 m3 and 6300 m3) and a polishing pond (7000 m3) to increase the retention time up to 3-4 days before returning to the Hikkaduwa Lake through a decant structure (Kalubowila et.al, 2013; Chandana, 2013). Influent sample w…
No.	Compound	1.Influent	2.Effluent
1	acetaminophen	D	D
2	amitriptyline	ND	D
3	amoxicillin	D	D
4	antipyrine	ND	ND
5	atenolol	D	D
6	azithromycin	ND	ND
7	benzylpenicillin	ND	ND
8	bezafibrate	D	D
9	bromovalerylurea	ND	ND
10	carbazochrom	ND	ND
11	chlormadinone acetate	ND	ND
12	chlorpromazine	ND	ND
13	chlortetracycline	ND	ND
14	ciprofloxacin	D	ND
15	clarithromycin	ND	ND
16	clenbuterol	ND	ND
17	cyclophosphamide	ND	ND
18	danofloxacin	ND	ND
19	dextromethorphan	ND	ND
20	diclofenac	ND	ND
21	difenidol	ND	ND
22	dilthiazem	D	ND
23	dipyridamol	ND	D
24	disopyramide	ND	D
25	erythromycin	ND	ND
26	ethenzamide	ND	ND
27	flavoxate	ND	ND
28	flufenamic acid	ND	ND
29	gemfibrozil	ND	ND
30	griseofulvin	ND	ND
31	haloperizole	ND	ND
32	ifenprodil	ND	ND
33	imipramine	ND	ND
34	indomethacin	ND	ND
35	isopropylantipyrine	ND	ND
36	josamycin	ND	ND
37	ketoprofen	D	ND
38	kitasamycin	ND	ND
39	mefenamic acid	D	D
40	mepirizole	ND	ND
41	methoxalen	ND	ND
42	metoclopramide	ND	D
43	metoprolol	ND	D
44	nalidixic acid	D	D
45	neospiramycin	ND	ND
46	norfloxacin	D	ND
47	ofloxacin + levofloxacin	D	D
48	oleandmycin	ND	ND
49	oxolinic acid	ND	ND
50	oxytetracycline	ND	ND
51	pentoxifylline	ND	ND
52	phenacetin	ND	ND
53	phenytoin	ND	ND
54	pirenzepine	ND	ND
55	prednisolone	ND	ND
56	primidone	ND	ND
57	promethazine	ND	ND
58	propranolol	ND	ND
59	2-QCA	ND	ND
60	salbutamol	ND	D
61	sarafloxacin	ND	ND
62	scopolamine	ND	ND
63	sotalol	D	D
64	spiramycin	ND	ND
65	spironolactone	ND	ND
66	sulfadimethoxine	ND	ND
67	sulfadimizine	ND	ND
68	sulfamethoxazole	D	D
69	sulfamonomethoxine	ND	ND
70	sulfapyridine	D	D
71	sulpiride	D	D
72	terbutaline	ND	ND
73	tetracycline	ND	ND
74	tilmicosin	ND	ND
75	tolbutamide	ND	ND
76	tolperisone	ND	ND
77	trimethoprim	D	ND
78	verapamil	ND	ND
79	caffeine	D	D
80	carbamazepine	D	D
81	crotamiton	ND	ND
82	DEET	D	D

## Sheet: Table S2
Table S2. Physicochemical properties of 8 targeted analytes
Compound	CAS Registry	Molecular weight g/mol	Sub-Category	Log Kow	pKa
Acesulfame	55589-62-3	201.24	Artificial Sweetener	-1.33	~2
Acetaminophen	103-90-2	151.16	Antipyretic	0.46	9.38
Atenolol	29122-68-7	266.34	Beta-blocker	0.16	9.6
Caffeine	1958-08-02	194.19	Stimulant	-0.07	14
Carbamazepine	298-46-4	236.27	Neuroactive drugs	2.45	13.9
Cotinine	486-56-6	176.21	Tobacco metabolite	0.07	4.79
Sulfamethoxazole	723-46-6	253.28	Antibiotic	0.89	5.7
Sulfapyridine	144-83-2	249.29	Antibiotic	0.35	8.43

## Sheet: Table S3
Table S3. MS setting
Analyte	Abbreviation	Q1 Mass (m/z)	Q3 Mass (m/z)	Quantitation reference
Positive Electrospray Ionization (+) ESI
Acetaminophen	ACT	152.1	110	Acetaminophen -d4
Atenolol	ATE	267.2	190.1	Atenolol -d7
Caffeine	CAF	195.1	138.1	n.a
Carbamazepine	CBZ	237.2	194	Carbamazepine 13C6
Cotinine	COT	177.1	80.05	Cotinine-d3
Sulfamethoxazole	SFM	254.1	92	n.a
Sulfapyridine	SFP	250.1	92	n.a
Negative Electrospray Ionization (-) ESI
Acesulfame	ACS	162	82	Acesulfame -d4

## Sheet: Table S4
Table S4. Laboratory report (Standard deviation is presented in parentheses for 3 replicates)
Compound	Abbr	Retention time	Range	Linearity	IDLa	IQLb
		min	ng/mL		ng/mL	ng/mL
Acesulfame	ACS	1.28 (0.04)	0.1 - 100	0.9976	0.05	0.15
Acetaminophen	ACT	2.05 (0.03)	0.1 - 100	0.9965	0.05	0.15
Atenolol	ATE	3.51 (0.04)	0.1 - 100	0.9996	0.05	0.15
Caffeine	CAF	5.60 (0.01)	0.1 - 100	0.9956	0.05	0.15
Carbamazepine	CBZ	7.43 (0.01)	0.01 - 10	0.9969	0.001	0.003
Cotinine	COT	1.87 (0.03)	0.1 - 100	0.9985	0.03	0.09
Sulfamethoxazole	SFM	5.84 (0.01)	0.1 - 100	0.9981	0.03	0.09
Sulfapyridine	SFP	5.92 (0.01)	0.1 - 100	0.9942	0.03	0.09
Note
Linearity was the r value of 8 points calibration standard curve in corresponding concentration range.
IDL: Method Detection Limit is equal to 3 times the computed standard deviation of 7 standard spike samples at 0.1 ng/mL
IQL: Method Quantitation Limit is set at a factor of 3 times of IDL.
